# Supplementary material for: Gender Differences in the Consequences of Divorce: A Study of Multiple Outcomes
Source: PubMed Central journal article supplement (PMC5992251; doi:10.1007/s13524-018-0667-6), 2018-04-13
Supplement: 13524_2018_667_MOESM1_ESM.pdf [file 13524_2018_667_MOESM1_ESM.pdf]

# Online Resource 1

## Gender Differences in the Consequences of Divorce: A Study of Multiple Outcomes

Thomas Leopold

Table S1. *Fixed-Effects Models for Economic Outcomes*

|                                          | Annual Household Income (log) |                    | Risk of Poverty    |                    | Satisfaction with Income |                    | Satisfaction with Standard of Living |                    |
|------------------------------------------|-------------------------------|--------------------|--------------------|--------------------|--------------------------|--------------------|--------------------------------------|--------------------|
|                                          | Women                         | Men                | Women              | Men                | Women                    | Men                | Women                                | Men                |
| Years before/after divorce (ref.: -3/-5) |                               |                    |                    |                    |                          |                    |                                      |                    |
| -2/-1                                    | -0.01<br>(0.01)               | 0.01<br>(0.01)     | 0.00<br>(0.01)     | 0.01<br>(0.01)     | -0.06<br>(0.06)          | 0.02<br>(0.06)     | -0.03<br>(0.07)                      | -0.10<br>(0.07)    |
| 0                                        | -0.54***<br>(0.01)            | 0.07***<br>(0.01)  | 0.37***<br>(0.01)  | -0.01<br>(0.01)    | -1.12***<br>(0.07)       | -0.41***<br>(0.08) | -0.69***<br>(0.09)                   | -0.70***<br>(0.09) |
| 1/2                                      | -0.38***<br>(0.01)            | 0.06***<br>(0.01)  | 0.26***<br>(0.01)  | -0.01<br>(0.01)    | -0.71***<br>(0.06)       | -0.36***<br>(0.07) | -0.60***<br>(0.08)                   | -0.54***<br>(0.08) |
| 3/5                                      | -0.28***<br>(0.01)            | 0.04***<br>(0.01)  | 0.19***<br>(0.01)  | 0.01<br>(0.01)     | -0.50***<br>(0.06)       | -0.24***<br>(0.07) | -0.35***<br>(0.08)                   | -0.31***<br>(0.08) |
| Age (ref.: 21-24)                        |                               |                    |                    |                    |                          |                    |                                      |                    |
| 25-28                                    | 0.02<br>(0.01)                | 0.02<br>(0.01)     | -0.02**<br>(0.01)  | -0.02<br>(0.01)    | 0.14**<br>(0.06)         | 0.20<br>(0.09)     | -0.19**<br>(0.07)                    | -0.14<br>(0.11)    |
| 29-32                                    | 0.02<br>(0.01)                | 0.01<br>(0.01)     | -0.03***<br>(0.01) | -0.03**<br>(0.01)  | 0.23***<br>(0.06)        | 0.40***<br>(0.09)  | -0.24**<br>(0.08)                    | -0.13<br>(0.12)    |
| 33-36                                    | 0.03**<br>(0.01)              | 0.01<br>(0.02)     | -0.05***<br>(0.01) | -0.04**<br>(0.01)  | 0.34***<br>(0.07)        | 0.47***<br>(0.10)  | -0.29**<br>(0.09)                    | -0.20<br>(0.12)    |
| 37-40                                    | 0.09***<br>(0.01)             | 0.04<br>(0.02)     | -0.07***<br>(0.01) | -0.05***<br>(0.01) | 0.43***<br>(0.08)        | 0.60***<br>(0.10)  | -0.29**<br>(0.10)                    | -0.19<br>(0.13)    |
| 41-44                                    | 0.16***<br>(0.01)             | 0.09***<br>(0.02)  | -0.08***<br>(0.01) | -0.06***<br>(0.02) | 0.44***<br>(0.09)        | 0.65***<br>(0.11)  | -0.35**<br>(0.11)                    | -0.26<br>(0.14)    |
| 45-48                                    | 0.25***<br>(0.02)             | 0.16***<br>(0.02)  | -0.10***<br>(0.01) | -0.06***<br>(0.02) | 0.46***<br>(0.10)        | 0.65***<br>(0.12)  | -0.40**<br>(0.13)                    | -0.37*<br>(0.16)   |
| 49-52                                    | 0.31***<br>(0.02)             | 0.23***<br>(0.02)  | -0.10***<br>(0.02) | -0.07***<br>(0.02) | 0.47***<br>(0.11)        | 0.66***<br>(0.13)  | -0.48***<br>(0.14)                   | -0.51**<br>(0.17)  |
| 53-56                                    | 0.30***<br>(0.02)             | 0.27***<br>(0.02)  | -0.08***<br>(0.02) | -0.06**<br>(0.02)  | 0.50***<br>(0.12)        | 0.72***<br>(0.14)  | -0.55***<br>(0.16)                   | -0.61***<br>(0.18) |
| 57-60                                    | 0.24***<br>(0.02)             | 0.25***<br>(0.02)  | -0.05<br>(0.02)    | -0.04<br>(0.02)    | 0.53***<br>(0.14)        | 0.77***<br>(0.15)  | -0.64***<br>(0.17)                   | -0.64**<br>(0.19)  |
| Period (ref.: 1984-1987)                 |                               |                    |                    |                    |                          |                    |                                      |                    |
| 1988-1991                                | 0.11***<br>(0.00)             | 0.12***<br>(0.00)  | -0.01<br>(0.00)    | -0.01<br>(0.00)    | 0.17***<br>(0.03)        | 0.25***<br>(0.03)  |                                      |                    |
| 1992-1995                                | 0.17***<br>(0.01)             | 0.19***<br>(0.01)  | -0.00<br>(0.01)    | -0.01<br>(0.01)    | 0.03<br>(0.04)           | 0.21***<br>(0.04)  | -0.10**<br>(0.04)                    | -0.06<br>(0.04)    |
| 1996-1999                                | 0.12***<br>(0.01)             | 0.15***<br>(0.01)  | -0.01<br>(0.01)    | -0.03***<br>(0.01) | -0.08<br>(0.05)          | 0.04<br>(0.05)     | -0.12**<br>(0.05)                    | -0.06<br>(0.05)    |
| 2000-2003                                | 0.17***<br>(0.01)             | 0.21***<br>(0.01)  | -0.01<br>(0.01)    | -0.03**<br>(0.01)  | 0.01<br>(0.06)           | 0.13<br>(0.06)     | -0.06<br>(0.06)                      | 0.06<br>(0.06)     |
| 2004-2007                                | 0.18***<br>(0.01)             | 0.23***<br>(0.01)  | 0.00<br>(0.01)     | -0.03**<br>(0.01)  | -0.23**<br>(0.08)        | -0.09<br>(0.08)    | -0.06<br>(0.07)                      | 0.09<br>(0.07)     |
| 2008-2011                                | 0.16***<br>(0.01)             | 0.21***<br>(0.01)  | 0.01<br>(0.01)     | -0.03<br>(0.01)    | -0.14<br>(0.09)          | -0.06<br>(0.09)    |                                      |                    |
| 2012-2015                                | 0.16***<br>(0.02)             | 0.22***<br>(0.02)  | -0.00<br>(0.01)    | -0.04**<br>(0.01)  | 0.09<br>(0.10)           | 0.25<br>(0.10)     | 0.42***<br>(0.11)                    | 0.65***<br>(0.11)  |
| Unemployed (ref: not) <sup>a</sup>       | -0.01<br>(0.01)               | -0.10***<br>(0.01) | 0.00<br>(0.01)     | 0.10***<br>(0.01)  | -0.50***<br>(0.04)       | -1.42***<br>(0.04) | -0.13**<br>(0.05)                    | -0.67***<br>(0.05) |
| Satisfaction with health <sup>a</sup>    | 0.00<br>(0.00)                | 0.00**<br>(0.00)   | -0.00**<br>(0.00)  | -0.00**<br>(0.00)  | 0.20***<br>(0.00)        | 0.23***<br>(0.00)  | 0.19***<br>(0.01)                    | 0.20***<br>(0.01)  |
| Constant                                 | 9.76***<br>(0.01)             | 9.75***<br>(0.02)  | 0.15***<br>(0.01)  | 0.14***<br>(0.01)  | 5.12***<br>(0.06)        | 4.51***<br>(0.10)  | 6.52***<br>(0.09)                    | 6.23***<br>(0.13)  |
| N (individuals)                          | 9,157                         | 8,637              | 9,157              | 8,637              | 9,157                    | 8,637              | 5,777                                | 5,372              |

Note: SOEP 1984-2015, v32.1, release 2017. Standard errors in parentheses. \*\*\* p<0.001, \*\* p<0.01, \* p<0.05, + p<0.10.

<sup>a</sup> Value of the year before divorce carried forward in all subsequent observations.

Table S2. Fixed-Effects Models for Housing and Domestic Outcomes

|                                          | Residential Move   |                    | Home Ownership     |                    | Hours of Housework |                    | Satisfaction with Housework |                   |
|------------------------------------------|--------------------|--------------------|--------------------|--------------------|--------------------|--------------------|-----------------------------|-------------------|
|                                          | Women              | Men                | Women              | Men                | Women              | Men                | Women                       | Men               |
| Years before/after divorce (ref.: -3/-5) |                    |                    |                    |                    |                    |                    |                             |                   |
| -2/-1                                    | -0.02<br>(0.01)    | -0.03<br>(0.01)    | -0.03***<br>(0.01) | -0.03<br>(0.01)    | -0.09<br>(0.06)    | -0.01<br>(0.03)    | -0.06<br>(0.06)             | -0.03<br>(0.10)   |
| 0                                        | 0.32***<br>(0.01)  | 0.36***<br>(0.01)  | -0.21***<br>(0.01) | -0.18***<br>(0.01) | -0.54***<br>(0.07) | 0.34***<br>(0.04)  | 0.15<br>(0.07)              | -0.10<br>(0.11)   |
| 1/2                                      | 0.19***<br>(0.01)  | 0.14***<br>(0.01)  | -0.25***<br>(0.01) | -0.22***<br>(0.01) | -0.66***<br>(0.06) | 0.30***<br>(0.03)  | 0.20**<br>(0.06)            | 0.04<br>(0.10)    |
| 3/5                                      | 0.11***<br>(0.01)  | 0.07***<br>(0.01)  | -0.27***<br>(0.01) | -0.24***<br>(0.01) | -0.64***<br>(0.06) | 0.21***<br>(0.03)  | 0.12<br>(0.06)              | 0.08<br>(0.10)    |
| Age (ref.: 21-24)                        |                    |                    |                    |                    |                    |                    |                             |                   |
| 25-28                                    | -0.16***<br>(0.01) | -0.18***<br>(0.02) | 0.09***<br>(0.01)  | 0.05***<br>(0.01)  | 0.28***<br>(0.06)  | -0.08<br>(0.05)    | -0.32***<br>(0.06)          | -0.07<br>(0.15)   |
| 29-32                                    | -0.21***<br>(0.01) | -0.27***<br>(0.02) | 0.20***<br>(0.01)  | 0.15***<br>(0.01)  | 0.42***<br>(0.06)  | -0.12<br>(0.06)    | -0.47***<br>(0.06)          | -0.19<br>(0.15)   |
| 33-36                                    | -0.25***<br>(0.01) | -0.31***<br>(0.02) | 0.33***<br>(0.01)  | 0.28***<br>(0.02)  | 0.50***<br>(0.07)  | -0.19***<br>(0.06) | -0.48***<br>(0.07)          | -0.27<br>(0.16)   |
| 37-40                                    | -0.27***<br>(0.01) | -0.34***<br>(0.02) | 0.39***<br>(0.01)  | 0.38***<br>(0.02)  | 0.41***<br>(0.08)  | -0.24***<br>(0.06) | -0.50***<br>(0.08)          | -0.27<br>(0.17)   |
| 41-44                                    | -0.28***<br>(0.01) | -0.36***<br>(0.02) | 0.42***<br>(0.01)  | 0.43***<br>(0.02)  | 0.22**<br>(0.09)   | -0.25***<br>(0.06) | -0.50***<br>(0.09)          | -0.26<br>(0.18)   |
| 45-48                                    | -0.27***<br>(0.02) | -0.35***<br>(0.02) | 0.42***<br>(0.01)  | 0.44***<br>(0.02)  | 0.08<br>(0.10)     | -0.27***<br>(0.07) | -0.44***<br>(0.10)          | -0.20<br>(0.20)   |
| 49-52                                    | -0.26***<br>(0.02) | -0.34***<br>(0.02) | 0.41***<br>(0.02)  | 0.43***<br>(0.02)  | -0.11<br>(0.11)    | -0.26***<br>(0.07) | -0.39***<br>(0.11)          | -0.21<br>(0.21)   |
| 53-56                                    | -0.25***<br>(0.02) | -0.33***<br>(0.03) | 0.40***<br>(0.02)  | 0.42***<br>(0.02)  | -0.25<br>(0.12)    | -0.28***<br>(0.08) | -0.29<br>(0.13)             | -0.21<br>(0.23)   |
| 57-60                                    | -0.23***<br>(0.02) | -0.31***<br>(0.03) | 0.39***<br>(0.02)  | 0.41***<br>(0.02)  | -0.38**<br>(0.13)  | -0.18<br>(0.08)    | -0.27<br>(0.14)             | -0.13<br>(0.25)   |
| Period (ref.: 1984-1987)                 |                    |                    |                    |                    |                    |                    |                             |                   |
| 1988-1991                                | -0.02***<br>(0.01) | -0.02***<br>(0.01) | 0.02***<br>(0.00)  | 0.02***<br>(0.00)  |                    |                    | -0.19***<br>(0.03)          | -0.13<br>(0.07)   |
| 1992-1995                                | -0.03***<br>(0.01) | -0.03***<br>(0.01) | 0.05***<br>(0.01)  | 0.05***<br>(0.01)  | 0.07<br>(0.04)     | -0.00<br>(0.02)    | -0.35***<br>(0.04)          | -0.17<br>(0.08)   |
| 1996-1999                                | -0.03***<br>(0.01) | -0.03***<br>(0.01) | 0.08***<br>(0.01)  | 0.09***<br>(0.01)  | 0.09<br>(0.04)     | 0.03<br>(0.02)     | -0.29***<br>(0.05)          | -0.19<br>(0.09)   |
| 2000-2003                                | -0.05***<br>(0.01) | -0.05***<br>(0.01) | 0.12***<br>(0.01)  | 0.14***<br>(0.01)  | -0.01<br>(0.05)    | 0.07<br>(0.03)     | -0.26***<br>(0.07)          | -0.12<br>(0.11)   |
| 2004-2007                                | -0.07***<br>(0.01) | -0.08***<br>(0.01) | 0.15***<br>(0.01)  | 0.17***<br>(0.01)  | -0.03<br>(0.06)    | 0.11**<br>(0.03)   | -0.27***<br>(0.08)          | -0.03<br>(0.13)   |
| 2008-2011                                | -0.10***<br>(0.02) | -0.10***<br>(0.02) | 0.17***<br>(0.01)  | 0.19***<br>(0.01)  | -0.05<br>(0.07)    | 0.14***<br>(0.04)  | -0.22<br>(0.09)             | 0.10<br>(0.15)    |
| 2012-2015                                | -0.12***<br>(0.02) | -0.13***<br>(0.02) | 0.20***<br>(0.02)  | 0.23***<br>(0.02)  | -0.16<br>(0.08)    | 0.15**<br>(0.05)   | -0.24<br>(0.11)             | 0.10<br>(0.17)    |
| Unemployed (ref: not) <sup>a</sup>       | 0.02**<br>(0.01)   | -0.01<br>(0.01)    | 0.03***<br>(0.01)  | -0.00<br>(0.01)    | 0.50***<br>(0.03)  | 0.70***<br>(0.02)  | 0.02<br>(0.04)              | -0.13<br>(0.06)   |
| Satisfaction with health <sup>a</sup>    | 0.00<br>(0.00)     | 0.00<br>(0.00)     | 0.00<br>(0.00)     | 0.00**<br>(0.00)   | -0.00<br>(0.00)    | -0.00<br>(0.00)    | 0.21***<br>(0.00)           | 0.21***<br>(0.01) |
| Constant                                 | 0.37***<br>(0.01)  | 0.46***<br>(0.02)  | 0.17***<br>(0.01)  | 0.13***<br>(0.02)  | 2.96***<br>(0.07)  | 0.81***<br>(0.06)  | 5.86***<br>(0.07)           | 5.65***<br>(0.16) |
| N (individuals)                          | 9,157              | 8,637              | 9,157              | 8,637              | 8,218              | 7,682              | 9,022                       | 7,154             |

Note: SOEP 1984-2015, v32.1, release 2017. Standard errors in parentheses. \*\*\* p<0.001, \*\* p<0.01, \* p<0.05, + p<0.10.

<sup>a</sup> Value of the year before divorce carried forward in all subsequent observations.

Table S3. *Fixed-Effects Models for Health and Well-Being Outcomes*

|                                             | Satisfaction with Life |                    | Mental Health      |                    | Body Mass Index    |                    | Physical Health    |                   | Smoking            |                   | Drinking        |                  |
|---------------------------------------------|------------------------|--------------------|--------------------|--------------------|--------------------|--------------------|--------------------|-------------------|--------------------|-------------------|-----------------|------------------|
|                                             | Women                  | Men                | Women              | Men                | Women              | Men                | Women              | Men               | Women              | Men               | Women           | Men              |
| Years before/after divorce<br>(ref.: -3/-5) |                        |                    |                    |                    |                    |                    |                    |                   |                    |                   |                 |                  |
| -2/-1                                       | -0.39***<br>(0.05)     | -0.28***<br>(0.05) | -2.20**<br>(0.68)  | -1.23<br>(0.71)    | -0.07<br>(0.15)    | -0.36*<br>(0.14)   | 1.28<br>(0.50)     | -0.15<br>(0.54)   | 0.01<br>(0.02)     | -0.02<br>(0.03)   | -0.01<br>(0.03) | 0.07<br>(0.05)   |
| 0                                           | -0.60***<br>(0.06)     | -0.85***<br>(0.06) | -4.55***<br>(0.87) | -5.63***<br>(0.87) | -0.89***<br>(0.19) | -1.18***<br>(0.18) | 2.99***<br>(0.65)  | 2.41***<br>(0.67) | 0.09***<br>(0.03)  | 0.02<br>(0.03)    | -0.02<br>(0.04) | 0.08<br>(0.06)   |
| 1/2                                         | -0.23***<br>(0.05)     | -0.20***<br>(0.05) | -2.80***<br>(0.69) | -1.72<br>(0.73)    | -0.38<br>(0.15)    | -0.69***<br>(0.15) | 1.54**<br>(0.51)   | 0.46<br>(0.56)    | 0.02<br>(0.02)     | 0.03<br>(0.03)    | 0.01<br>(0.04)  | 0.05<br>(0.06)   |
| 3/5                                         | -0.13**<br>(0.05)      | -0.04<br>(0.05)    | -2.30**<br>(0.72)  | -0.58<br>(0.76)    | -0.20<br>(0.16)    | -0.27<br>(0.15)    | 0.61<br>(0.53)     | -0.56<br>(0.58)   | 0.00<br>(0.02)     | -0.00<br>(0.03)   | -0.03<br>(0.05) | 0.02<br>(0.08)   |
| Age (ref.: 21-24)                           |                        |                    |                    |                    |                    |                    |                    |                   |                    |                   |                 |                  |
| 25-28                                       | -0.13**<br>(0.05)      | -0.10<br>(0.07)    | 0.81<br>(0.97)     | 1.58<br>(1.37)     | 0.21<br>(0.22)     | 0.71<br>(0.28)     | 0.09<br>(0.72)     | -1.46<br>(1.05)   | 0.02<br>(0.03)     | -0.04<br>(0.05)   | -0.00<br>(0.05) | 0.10<br>(0.11)   |
| 29-32                                       | -0.16**<br>(0.05)      | -0.09<br>(0.08)    | 0.31<br>(1.07)     | 0.14<br>(1.46)     | 0.44<br>(0.24)     | 1.03***<br>(0.29)  | 0.07<br>(0.79)     | -1.42<br>(1.11)   | 0.03<br>(0.03)     | -0.09<br>(0.05)   | 0.02<br>(0.06)  | 0.11<br>(0.13)   |
| 33-36                                       | -0.16**<br>(0.06)      | -0.14<br>(0.08)    | 0.27<br>(1.15)     | -0.00<br>(1.53)    | 0.65<br>(0.26)     | 1.42***<br>(0.31)  | -0.41<br>(0.85)    | -1.73<br>(1.17)   | 0.03<br>(0.03)     | -0.10<br>(0.05)   | 0.02<br>(0.07)  | 0.09<br>(0.14)   |
| 37-40                                       | -0.22***<br>(0.06)     | -0.13<br>(0.09)    | 0.28<br>(1.25)     | 0.39<br>(1.60)     | 0.89**<br>(0.28)   | 1.64***<br>(0.32)  | -0.94<br>(0.92)    | -1.91<br>(1.22)   | 0.03<br>(0.04)     | -0.11<br>(0.06)   | 0.04<br>(0.07)  | 0.04<br>(0.14)   |
| 41-44                                       | -0.25***<br>(0.07)     | -0.18<br>(0.09)    | 0.40<br>(1.35)     | 0.21<br>(1.68)     | 1.12***<br>(0.30)  | 1.79***<br>(0.34)  | -1.59<br>(1.00)    | -2.02<br>(1.28)   | 0.02<br>(0.04)     | -0.11<br>(0.06)   | 0.05<br>(0.07)  | 0.02<br>(0.15)   |
| 45-48                                       | -0.31***<br>(0.08)     | -0.22<br>(0.10)    | 0.51<br>(1.47)     | 0.45<br>(1.76)     | 1.38***<br>(0.33)  | 2.02***<br>(0.35)  | -2.23<br>(1.09)    | -2.39<br>(1.35)   | 0.02<br>(0.04)     | -0.13<br>(0.06)   | 0.08<br>(0.08)  | 0.03<br>(0.15)   |
| 49-52                                       | -0.33***<br>(0.09)     | -0.23<br>(0.11)    | 0.33<br>(1.59)     | 0.35<br>(1.86)     | 1.66***<br>(0.35)  | 2.28***<br>(0.37)  | -2.86<br>(1.18)    | -2.80<br>(1.42)   | 0.02<br>(0.05)     | -0.15<br>(0.07)   | 0.08<br>(0.08)  | 0.01<br>(0.16)   |
| 53-56                                       | -0.37***<br>(0.10)     | -0.27<br>(0.12)    | 0.89<br>(1.73)     | 0.72<br>(1.97)     | 1.97***<br>(0.38)  | 2.36***<br>(0.40)  | -4.07**<br>(1.28)  | -3.98**<br>(1.50) | 0.01<br>(0.05)     | -0.15<br>(0.07)   | 0.09<br>(0.09)  | -0.05<br>(0.16)  |
| 57-60                                       | -0.35**<br>(0.11)      | -0.19<br>(0.13)    | 0.66<br>(1.87)     | 1.52<br>(2.08)     | 1.98***<br>(0.41)  | 2.49***<br>(0.42)  | -5.07***<br>(1.38) | -4.37**<br>(1.59) | -0.01<br>(0.05)    | -0.17<br>(0.07)   | 0.09<br>(0.09)  | -0.09<br>(0.17)  |
| Period (ref.: 1984-1987)                    |                        |                    |                    |                    |                    |                    |                    |                   |                    |                   |                 |                  |
| 1988-1991                                   | -0.07**<br>(0.02)      | -0.09***<br>(0.02) |                    |                    |                    |                    |                    |                   |                    |                   |                 |                  |
| 1992-1995                                   | -0.10**<br>(0.03)      | -0.06<br>(0.03)    |                    |                    |                    |                    |                    |                   |                    |                   |                 |                  |
| 1996-1999                                   | -0.18***<br>(0.04)     | -0.15***<br>(0.04) |                    |                    |                    |                    |                    |                   |                    |                   |                 |                  |
| 2000-2003                                   | -0.21***<br>(0.05)     | -0.21***<br>(0.05) |                    |                    |                    |                    |                    |                   |                    |                   |                 |                  |
| 2004-2007                                   | -0.40***<br>(0.06)     | -0.35***<br>(0.06) | 0.67**<br>(0.23)   | 0.35<br>(0.22)     | 0.26***<br>(0.05)  | 0.20***<br>(0.04)  | 0.39<br>(0.17)     | 0.13<br>(0.17)    | -0.02**<br>(0.01)  | -0.02**<br>(0.01) |                 |                  |
| 2008-2011                                   | -0.33***<br>(0.07)     | -0.30***<br>(0.07) | 0.76<br>(0.37)     | 0.20<br>(0.35)     | 0.56***<br>(0.08)  | 0.49***<br>(0.07)  | 0.32<br>(0.27)     | -0.26<br>(0.27)   | -0.04***<br>(0.01) | -0.03<br>(0.01)   | -0.00<br>(0.01) | 0.03**<br>(0.01) |
| 2012-2015                                   | -0.37***<br>(0.08)     | -0.32***<br>(0.08) | 0.82<br>(0.54)     | -0.18<br>(0.52)    | 0.74***<br>(0.12)  | 0.62***<br>(0.10)  | -0.07<br>(0.40)    | -0.73<br>(0.39)   | -0.03<br>(0.02)    | -0.06**<br>(0.02) |                 |                  |
| Unemployed<br>(ref: not) <sup>a</sup>       | -0.21***<br>(0.03)     | -0.87***<br>(0.03) | -0.19<br>(0.46)    | -2.50***<br>(0.46) | 0.05<br>(0.10)     | 0.11<br>(0.09)     | -0.30<br>(0.34)    | 0.40<br>(0.35)    | -0.02<br>(0.01)    | 0.01<br>(0.02)    | 0.00<br>(0.02)  | 0.03<br>(0.03)   |
| Satisfaction with<br>health <sup>a</sup>    | 0.24***<br>(0.00)      | 0.25***<br>(0.00)  | 0.93***<br>(0.05)  | 0.78***<br>(0.05)  | -0.03**<br>(0.01)  | -0.03**<br>(0.01)  | 1.68***<br>(0.04)  | 1.67***<br>(0.04) | 0.00<br>(0.00)     | 0.00<br>(0.00)    | -0.00<br>(0.00) | -0.00<br>(0.00)  |
| Constant                                    | 6.22***                | 5.97***            | 41.95***           | 44.90***           | 23.77***           | 25.02***           | 41.54***           | 43.01***          | 0.26***            | 0.46***           | 0.04            | 0.24             |
| N (individuals)                             | 9,157                  | 8,637              | 5,756              | 5,368              | 5,756              | 5,368              | 5,756              | 5,368             | 5,756              | 5,368             | 2,992           | 2,708            |

Note: SOEP 1984-2015, v32.1, release 2017. Standard errors in parentheses. \*\*\* p<0.001, \*\* p<0.01. <sup>a</sup> Value of the year before divorce carried forward in all subsequent observations.

Table S4. Fixed-Effects Models for Social Outcomes

|                                          | Partner in Household |                    | Single Parenting   |                    | Sat. with Family Life |                    | Loneliness         |                    | Visiting Relatives |                   | Visiting Friends  |                  |
|------------------------------------------|----------------------|--------------------|--------------------|--------------------|-----------------------|--------------------|--------------------|--------------------|--------------------|-------------------|-------------------|------------------|
|                                          | Women                | Men                | Women              | Men                | Women                 | Men                | Women              | Men                | Women              | Men               | Women             | Men              |
| Years before/after divorce (ref.: -3/-5) |                      |                    |                    |                    |                       |                    |                    |                    |                    |                   |                   |                  |
| -2/-1                                    | -0.02***<br>(0.00)   | -0.01<br>(0.00)    | 0.01<br>(0.00)     | 0.01<br>(0.00)     | -0.80***<br>(0.11)    | -0.53***<br>(0.12) | 0.04<br>(0.04)     | 0.06<br>(0.04)     | 0.04<br>(0.06)     | -0.00<br>(0.06)   | -0.20**<br>(0.06) | -0.16<br>(0.06)  |
| 0                                        | -0.80***<br>(0.00)   | -0.79***<br>(0.00) | 0.54***<br>(0.00)  | 0.13***<br>(0.00)  | -1.66***<br>(0.12)    | -2.44***<br>(0.13) | 0.05<br>(0.05)     | 0.32***<br>(0.05)  | -0.04<br>(0.06)    | 0.06<br>(0.07)    | 0.03<br>(0.06)    | 0.19**<br>(0.07) |
| +1/+2                                    | -0.74***<br>(0.00)   | -0.69***<br>(0.00) | 0.52***<br>(0.00)  | 0.13***<br>(0.00)  | -0.66***<br>(0.11)    | -1.00***<br>(0.12) | 0.03<br>(0.05)     | 0.13**<br>(0.04)   | -0.00<br>(0.05)    | 0.01<br>(0.05)    | -0.02<br>(0.05)   | 0.12<br>(0.05)   |
| +3/+5                                    | -0.61***<br>(0.00)   | -0.59***<br>(0.00) | 0.44***<br>(0.00)  | 0.10***<br>(0.00)  | -0.47***<br>(0.12)    | -0.30<br>(0.13)    | -0.05<br>(0.05)    | 0.16***<br>(0.05)  | 0.00<br>(0.05)     | 0.01<br>(0.06)    | -0.12<br>(0.05)   | 0.04<br>(0.06)   |
| Age (ref.: 21-24)                        |                      |                    |                    |                    |                       |                    |                    |                    |                    |                   |                   |                  |
| 25-28                                    | 0.01<br>(0.00)       | 0.03***<br>(0.01)  | -0.00<br>(0.00)    | -0.02***<br>(0.00) | -0.23<br>(0.13)       | -0.19<br>(0.22)    | 0.09*<br>(0.03)    | 0.04<br>(0.05)     | 0.04<br>(0.05)     | 0.00<br>(0.08)    | -0.04<br>(0.05)   | -0.09<br>(0.08)  |
| 29-32                                    | 0.02***<br>(0.00)    | 0.04***<br>(0.01)  | -0.02***<br>(0.00) | -0.02***<br>(0.00) | -0.34<br>(0.15)       | -0.35<br>(0.24)    | 0.07<br>(0.04)     | 0.03<br>(0.06)     | 0.07<br>(0.05)     | -0.02<br>(0.08)   | -0.02<br>(0.05)   | -0.16<br>(0.08)  |
| 33-36                                    | 0.03***<br>(0.00)    | 0.05***<br>(0.01)  | -0.02***<br>(0.00) | -0.03***<br>(0.00) | -0.39<br>(0.16)       | -0.57<br>(0.24)    | 0.06<br>(0.05)     | 0.04<br>(0.06)     | 0.04<br>(0.06)     | -0.06<br>(0.09)   | 0.00<br>(0.07)    | -0.19<br>(0.09)  |
| 37-40                                    | 0.02***<br>(0.00)    | 0.05***<br>(0.01)  | -0.02***<br>(0.00) | -0.03***<br>(0.00) | -0.53**<br>(0.17)     | -0.76**<br>(0.25)  | 0.05<br>(0.05)     | 0.04<br>(0.06)     | -0.00<br>(0.08)    | -0.05<br>(0.10)   | -0.04<br>(0.08)   | -0.20<br>(0.10)  |
| 41-44                                    | 0.02***<br>(0.01)    | 0.05***<br>(0.01)  | -0.01*<br>(0.01)   | -0.03***<br>(0.00) | -0.70***<br>(0.17)    | -0.86***<br>(0.26) | 0.04<br>(0.06)     | 0.03<br>(0.07)     | 0.00<br>(0.09)     | -0.02<br>(0.12)   | -0.05<br>(0.10)   | -0.21<br>(0.11)  |
| 45-48                                    | 0.02***<br>(0.01)    | 0.05***<br>(0.01)  | -0.01<br>(0.01)    | -0.02***<br>(0.00) | -0.78***<br>(0.18)    | -0.93***<br>(0.26) | 0.05<br>(0.07)     | 0.01<br>(0.08)     | 0.03<br>(0.11)     | 0.00<br>(0.13)    | -0.04<br>(0.11)   | -0.23<br>(0.13)  |
| 49-52                                    | 0.02***<br>(0.01)    | 0.04***<br>(0.01)  | -0.01<br>(0.01)    | -0.02***<br>(0.00) | -0.76***<br>(0.20)    | -1.06***<br>(0.27) | 0.03<br>(0.08)     | 0.03<br>(0.08)     | 0.06<br>(0.13)     | 0.08<br>(0.15)    | -0.05<br>(0.13)   | -0.22<br>(0.14)  |
| 53-56                                    | 0.02**<br>(0.01)     | 0.04***<br>(0.01)  | -0.01<br>(0.01)    | -0.02***<br>(0.01) | -0.78***<br>(0.21)    | -1.03***<br>(0.28) | 0.02<br>(0.09)     | 0.03<br>(0.09)     | 0.15<br>(0.14)     | 0.16<br>(0.16)    | -0.06<br>(0.15)   | -0.23<br>(0.16)  |
| 57-60                                    | 0.02**<br>(0.01)     | 0.04***<br>(0.01)  | -0.02<br>(0.01)    | -0.02***<br>(0.01) | -0.71**<br>(0.22)     | -1.10***<br>(0.29) | -0.01<br>(0.09)    | -0.00<br>(0.10)    | 0.17<br>(0.16)     | 0.25<br>(0.18)    | -0.01<br>(0.16)   | -0.18<br>(0.18)  |
| Period (ref.: 1984-1987)                 |                      |                    |                    |                    |                       |                    |                    |                    |                    |                   |                   |                  |
| 1988-1991                                | -0.00<br>(0.00)      | 0.00<br>(0.00)     | -0.00<br>(0.00)    | 0.00<br>(0.00)     |                       |                    |                    |                    |                    |                   |                   |                  |
| 1992-1995                                | 0.00<br>(0.00)       | 0.01**<br>(0.00)   | -0.00<br>(0.00)    | -0.00<br>(0.00)    |                       |                    |                    |                    | -0.01<br>(0.03)    | -0.05<br>(0.03)   | 0.03<br>(0.03)    | 0.00<br>(0.03)   |
| 1996-1999                                | 0.00<br>(0.00)       | 0.00<br>(0.00)     | -0.00<br>(0.00)    | -0.00<br>(0.00)    |                       |                    | -0.00<br>(0.01)    | -0.01<br>(0.01)    | -0.03<br>(0.04)    | -0.10<br>(0.04)   | 0.00<br>(0.04)    | 0.02<br>(0.04)   |
| 2000-2003                                | 0.00<br>(0.00)       | 0.01<br>(0.00)     | -0.00<br>(0.00)    | -0.00<br>(0.00)    |                       |                    |                    |                    | -0.06<br>(0.06)    | -0.17**<br>(0.06) | -0.02<br>(0.06)   | -0.01<br>(0.06)  |
| 2004-2007                                | -0.00<br>(0.00)      | 0.00<br>(0.00)     | -0.00<br>(0.00)    | -0.00<br>(0.00)    |                       |                    |                    |                    |                    |                   |                   |                  |
| 2008-2011                                | -0.00<br>(0.01)      | 0.00<br>(0.01)     | -0.00<br>(0.01)    | -0.00<br>(0.00)    | 0.11***<br>(0.03)     | 0.10***<br>(0.03)  | 0.04<br>(0.04)     | 0.04<br>(0.04)     | -0.11<br>(0.08)    | -0.23**<br>(0.09) | -0.08<br>(0.08)   | -0.08<br>(0.09)  |
| 2012-2015                                | -0.00<br>(0.01)      | 0.00<br>(0.01)     | -0.00<br>(0.01)    | -0.00<br>(0.00)    | 0.01<br>(0.04)        | 0.03<br>(0.04)     | 0.03<br>(0.05)     | 0.02<br>(0.05)     | -0.19<br>(0.10)    | -0.34**<br>(0.11) | -0.16<br>(0.10)   | -0.13<br>(0.11)  |
| Unemployed (ref: not) <sup>a</sup>       | -0.00<br>(0.00)      | 0.00<br>(0.00)     | 0.00<br>(0.00)     | 0.00<br>(0.00)     | 0.11<br>(0.06)        | 0.02<br>(0.06)     | 0.04<br>(0.02)     | 0.08***<br>(0.02)  | 0.05<br>(0.03)     | 0.05<br>(0.03)    | 0.04<br>(0.03)    | -0.00<br>(0.03)  |
| Satisfaction with health <sup>a</sup>    | -0.00<br>(0.00)      | -0.00<br>(0.00)    | -0.00<br>(0.00)    | -0.00<br>(0.00)    | 0.16***<br>(0.01)     | 0.15***<br>(0.01)  | -0.02***<br>(0.00) | -0.01***<br>(0.00) | 0.00<br>(0.00)     | 0.01<br>(0.00)    | 0.01<br>(0.00)    | -0.00<br>(0.00)  |
| Constant                                 | 0.98***              | 0.95***            | 0.02***            | 0.03***            | 7.61***               | 7.94***            | 0.22***            | 0.13               | 0.54***            | 0.52***           | 0.50***           | 0.61***          |
| N (individuals)                          | 9,157                | 8,637              | 9,157              | 8,637              | 6,017                 | 5,613              | 4,396              | 4,013              | 6,578              | 6,034             | 6,580             | 6,036            |

Note: SOEP 1984-2015, v32.1, release 2017. Standard errors in parentheses. \*\*\* p<0.001, \*\* p<0.01. <sup>a</sup> Value of the year before divorce carried forward in all subsequent observations.

Table S5. Fully Interacted Fixed-Effects Models for Economic Outcomes and Housing/Domestic Outcomes

|                                        | Annual Household<br>Income (log) | Risk of<br>Poverty | Satisfaction with<br>Income | Satisfaction with<br>Standard of Living | Residential<br>Move | Home<br>Ownership  | Hours of<br>Housework | Satisfaction with<br>Housework |
|----------------------------------------|----------------------------------|--------------------|-----------------------------|-----------------------------------------|---------------------|--------------------|-----------------------|--------------------------------|
| Years before/after<br>divorce          |                                  |                    |                             |                                         |                     |                    |                       |                                |
| -2/-1                                  | 0.01<br>(0.01)                   | 0.01<br>(0.01)     | 0.02<br>(0.07)              | -0.10<br>(0.08)                         | -0.03<br>(0.01)     | -0.03<br>(0.01)    | -0.01<br>(0.05)       | -0.03<br>(0.09)                |
| 0                                      | 0.07***<br>(0.01)                | -0.01<br>(0.01)    | -0.41***<br>(0.08)          | -0.70***<br>(0.09)                      | 0.36***<br>(0.01)   | -0.18***<br>(0.01) | 0.34***<br>(0.06)     | -0.10<br>(0.10)                |
| +1/+2                                  | 0.06***<br>(0.01)                | -0.01<br>(0.01)    | -0.36***<br>(0.07)          | -0.54***<br>(0.08)                      | 0.14***<br>(0.01)   | -0.22***<br>(0.01) | 0.30***<br>(0.05)     | 0.04<br>(0.09)                 |
|                                        | 0.04***<br>(0.01)                | 0.01<br>(0.01)     | -0.24***<br>(0.07)          | -0.31***<br>(0.08)                      | 0.07***<br>(0.01)   | -0.24***<br>(0.01) | 0.21***<br>(0.05)     | 0.08<br>(0.09)                 |
| Years before/after<br>divorce x Female |                                  |                    |                             |                                         |                     |                    |                       |                                |
| -2/-1                                  | -0.02<br>(0.01)                  | -0.00<br>(0.01)    | -0.07<br>(0.09)             | 0.06<br>(0.10)                          | 0.01<br>(0.02)      | -0.01<br>(0.01)    | -0.08<br>(0.07)       | -0.02<br>(0.11)                |
| 0                                      | -0.61***<br>(0.02)               | 0.38***<br>(0.01)  | -0.71***<br>(0.11)          | 0.01<br>(0.13)                          | -0.04<br>(0.02)     | -0.03<br>(0.02)    | -0.88***<br>(0.08)    | 0.25<br>(0.13)                 |
| +1/+2                                  | -0.43***<br>(0.01)               | 0.27***<br>(0.01)  | -0.36***<br>(0.09)          | -0.06<br>(0.11)                         | 0.05**<br>(0.02)    | -0.03<br>(0.01)    | -0.95***<br>(0.07)    | 0.16<br>(0.11)                 |
| +3/+5                                  | -0.32***<br>(0.01)               | 0.18***<br>(0.01)  | -0.26**<br>(0.09)           | -0.05<br>(0.11)                         | 0.04<br>(0.02)      | -0.03<br>(0.01)    | -0.85***<br>(0.07)    | 0.05<br>(0.11)                 |

Note: SOEP 1984-2015, v32.1, release 2017. Standard errors in parentheses. \*\*\* p<0.001, \*\* p<0.01. Models control for all covariates shown in tables A1-A4 and interactions between these covariates and gender.

Table S6. Fully Interacted Fixed-Effects Models for Health/Well-Being Outcomes and Social Outcomes

|                                        | Satisfaction<br>with Life | Mental<br>Health   | Body Mass<br>Index | Physical<br>Health | Smoking         | Drinking        | Partner in<br>Household | Single<br>Parenting | Sat. with<br>Family Life | Loneli-<br>ness    | Visiting<br>Relatives | Visiting<br>Friends |
|----------------------------------------|---------------------------|--------------------|--------------------|--------------------|-----------------|-----------------|-------------------------|---------------------|--------------------------|--------------------|-----------------------|---------------------|
| Years before/after<br>divorce          |                           |                    |                    |                    |                 |                 |                         |                     |                          |                    |                       |                     |
| -2/-1                                  | -0.28***<br>(0.05)        | -1.23<br>(0.74)    | -0.36<br>(0.16)    | -0.15<br>(0.56)    | -0.02<br>(0.02) | 0.07<br>(0.04)  | -0.01<br>(0.00)         | 0.01<br>(0.00)      | -0.53***<br>(0.12)       | 0.06<br>(0.04)     | -0.00<br>(0.06)       | -0.16<br>(0.06)     |
| 0                                      | -0.85***<br>(0.06)        | -5.63***<br>(0.91) | -1.18***<br>(0.19) | 2.41***<br>(0.68)  | 0.02<br>(0.03)  | 0.08<br>(0.06)  | -0.79***<br>(0.00)      | 0.13***<br>(0.00)   | -2.44***<br>(0.13)       | 0.32***<br>(0.05)  | 0.06<br>(0.07)        | 0.19**<br>(0.07)    |
| +1/+2                                  | -0.20***<br>(0.06)        | -1.72<br>(0.77)    | -0.69***<br>(0.16) | 0.46<br>(0.57)     | 0.03<br>(0.02)  | 0.05<br>(0.05)  | -0.69***<br>(0.00)      | 0.13***<br>(0.00)   | -1.00***<br>(0.12)       | 0.13**<br>(0.05)   | 0.01<br>(0.05)        | 0.12<br>(0.05)      |
| +3/+5                                  | -0.04<br>(0.05)           | -0.58<br>(0.79)    | -0.27<br>(0.17)    | -0.56<br>(0.59)    | -0.00<br>(0.03) | 0.02<br>(0.06)  | -0.59***<br>(0.00)      | 0.10***<br>(0.00)   | -0.30<br>(0.13)          | 0.16**<br>(0.05)   | 0.01<br>(0.06)        | 0.04<br>(0.06)      |
| Years before/after<br>divorce x Female |                           |                    |                    |                    |                 |                 |                         |                     |                          |                    |                       |                     |
| -2/-1                                  | -0.10<br>(0.07)           | -0.97<br>(0.99)    | 0.29<br>(0.21)     | 1.43<br>(0.74)     | 0.03<br>(0.03)  | -0.08<br>(0.06) | -0.01<br>(0.01)         | 0.00<br>(0.00)      | -0.28<br>(0.16)          | -0.02<br>(0.06)    | 0.05<br>(0.09)        | -0.04<br>(0.09)     |
| 0                                      | 0.25**<br>(0.09)          | 1.08<br>(1.24)     | 0.29<br>(0.26)     | 0.58<br>(0.93)     | 0.06<br>(0.04)  | -0.10<br>(0.08) | -0.01<br>(0.01)         | 0.41***<br>(0.01)   | 0.77***<br>(0.17)        | -0.27***<br>(0.07) | -0.10<br>(0.09)       | -0.15<br>(0.09)     |
| +1/+2                                  | -0.03<br>(0.07)           | -1.08<br>(1.02)    | 0.31<br>(0.22)     | 1.08<br>(0.76)     | -0.01<br>(0.03) | -0.04<br>(0.07) | -0.05***<br>(0.01)      | 0.38***<br>(0.00)   | 0.34<br>(0.16)           | -0.10<br>(0.06)    | -0.01<br>(0.07)       | -0.14<br>(0.07)     |
| +3/+5                                  | -0.09<br>(0.07)           | -1.72<br>(1.05)    | 0.07<br>(0.22)     | 1.18<br>(0.79)     | 0.01<br>(0.03)  | -0.05<br>(0.09) | -0.02***<br>(0.01)      | 0.34***<br>(0.00)   | -0.17<br>(0.18)          | -0.22**<br>(0.07)  | -0.00<br>(0.08)       | -0.16<br>(0.08)     |

Note: SOEP 1984-2015, v32.1, release 2017. Standard errors in parentheses. \*\*\* p<0.001, \*\* p<0.01. Models control for all covariates shown in tables A1-A4 and interactions between these covariates and gender.

Table S7. *F-Tests for Change in R-Squared*

| Economic outcomes                    | F       | prob > F |
|--------------------------------------|---------|----------|
| Satisfaction with standard of living | 0.39    | 0.8168   |
| Satisfaction with income             | 13.66   | 0.0000   |
| Annual household income              | 532.75  | 0.0000   |
| Poverty                              | 301.21  | 0.0000   |
| Housing and domestic outcomes        |         |          |
| Residential moves                    | 7.26    | 0.0000   |
| Home ownership                       | 2.57    | 0.0357   |
| Satisfaction with housework          | 1.75    | 0.1350   |
| Hours of housework                   | 82.35   | 0.0000   |
| Health and well-being outcomes       |         |          |
| Satisfaction with life               | 5.24    | 0.0003   |
| Mental health                        | 1.68    | 0.1523   |
| Physical health                      | 1.07    | 0.3699   |
| BMI                                  | 0.95    | 0.4317   |
| Smoking                              | 1.32    | 0.2589   |
| Drinking                             | 0.83    | 0.5066   |
| Social outcomes                      |         |          |
| Partner                              | 21.19   | 0.0000   |
| Single parenting                     | 3661.70 | 0.0000   |
| Satisfaction with family life        | 17.42   | 0.0000   |
| Loneliness                           | 6.37    | 0.0000   |
| Visiting relatives                   | 0.53    | 0.7170   |
| Visiting friends                     | 2.30    | 0.0559   |

*Note:* Tests based on models estimated jointly for men and women, including the covariates shown in Tables A1-A4. Reference models are fully interacted by gender, except for the interactions between the four dummy variables for “Years before/after divorce” and gender. Model fit comparisons are shown between the reference models and models for which the interaction between “Years before/after divorce” and gender are added.
